# Supplementary material
Source: publisher figshare collection journal article supplement (https://frontiersin.figshare.com/ndownloader/files/22882418)
Supplement: Supplementary file 1 [file 22882418]

**Supplementary Table S1.** Distribution of shared and unique operational taxonomic units (OTUs) among bacterial communities in the endosphere (E), phyllosphere (P) and rhizosphere (R) of two Antarctic vascular plants, based on high-throughput DNA sequencing data in each plant species ( $n=4$ ).

| Taxa (phylum)          | <i>Deschampsia antarctica</i> |             |    |     | <i>Colobanthus quitensis</i> |             |     |     |
|------------------------|-------------------------------|-------------|----|-----|------------------------------|-------------|-----|-----|
|                        | Shared OTUs                   | Unique OTUs |    |     | Shared OTUs                  | Unique OTUs |     |     |
|                        |                               | E           | P  | R   |                              | E           | R   | R   |
| p_unclassified         |                               |             |    | 3   |                              |             |     | 1   |
| <i>Acidobacteria</i>   | 64                            | 2           | 9  | 374 | 23                           | 2           | 37  | 359 |
| <i>Actinobacteria</i>  | 196                           | 88          | 82 | 211 | 157                          | 48          | 138 | 197 |
| AD3                    |                               |             |    | 5   |                              |             |     | 7   |
| <i>Armatimonadetes</i> | 3                             | 1           | 2  | 40  | 3                            |             | 3   | 49  |
| <i>Bacteroidetes</i>   | 198                           | 15          | 87 | 294 | 97                           | 66          | 147 | 223 |
| BHI80-139              |                               |             |    | 2   |                              |             |     | 1   |
| BRC1                   |                               |             |    | 3   |                              |             | 1   | 2   |
| <i>Chlamydiae</i>      |                               |             |    | 2   |                              |             | 1   | 5   |
| <i>Chlorobi</i>        | 2                             |             |    | 7   | 15                           | 1           | 1   | 4   |
| <i>Chloroflexi</i>     | 28                            | 2           | 3  | 48  |                              |             | 12  | 55  |
| <i>Crenarchaeota</i>   | 2                             |             |    | 1   |                              | 1           |     | 4   |
| <i>Cyanobacteria</i>   | 4                             | 3           | 2  | 16  | 5                            |             | 6   | 19  |
| <i>Elusimicrobia</i>   |                               |             | 1  | 15  |                              |             |     | 17  |

|                         |     |     |     |     |     |     |     |     |
|-------------------------|-----|-----|-----|-----|-----|-----|-----|-----|
| <i>Euryarchaeota</i>    |     |     |     | 7   |     |     |     | 1   |
| FBP                     | 4   |     | 3   | 1   | 2   |     | 5   | 9   |
| <i>Fibrobacteres</i>    | 1   |     | 2   | 73  | 1   |     |     | 2   |
| <i>Firmicutes</i>       | 14  | 268 | 28  | 2   | 11  | 227 | 84  | 58  |
| <i>Fusobacteria</i>     |     |     |     | 45  |     |     | 7   | 1   |
| <i>Gemmatimonadetes</i> | 11  | 1   | 2   | 2   | 9   |     | 7   | 40  |
| <i>Lentisphaerae</i>    |     |     | 1   |     |     |     |     |     |
| <i>Nitrospirae</i>      | 3   |     |     | 7   |     |     |     | 2   |
| NKB19                   |     |     | 1   |     |     |     |     |     |
| OD1                     | 1   |     |     | 15  |     |     |     | 19  |
| OP11                    |     |     |     | 4   |     |     |     | 5   |
| OP3                     |     |     |     | 4   |     |     |     | 8   |
| <i>Planctomycetes</i>   | 25  | 9   | 6   | 181 | 13  | 3   | 10  | 218 |
| <i>Proteobacteria</i>   | 482 | 123 | 213 | 952 | 309 | 94  | 275 | 798 |
| <i>Spirocahetes</i>     |     |     |     |     |     |     | 1   |     |
| SR1                     |     |     |     | 1   |     |     |     | 1   |
| <i>Tenericutes</i>      |     | 1   | 1   |     |     |     |     |     |
| <i>Thermi</i>           | 3   |     | 1   | 2   |     |     | 1   | 2   |
| TM6                     |     |     |     | 11  |     |     |     | 11  |
| TM7                     | 16  | 2   | 11  | 29  | 7   | 1   | 7   | 23  |
| <i>Verrucomicrobia</i>  | 51  | 2   | 17  | 117 | 26  |     | 19  | 125 |
| WPS-2                   | 1   |     |     | 9   |     | 4   | 2   | 21  |

|           |       |     |       |       |     |  |       |       |
|-----------|-------|-----|-------|-------|-----|--|-------|-------|
| WS2       |       |     |       | 3     |     |  |       | 1     |
| WS3       |       |     |       | 3     |     |  |       | 4     |
| Sub-total |       |     |       | <hr/> |     |  | <hr/> |       |
|           |       | 517 | 472   | 2,489 |     |  | 447   | 764   |
|           |       |     |       |       |     |  |       | 2,292 |
| <hr/>     |       |     |       |       |     |  |       |       |
| Total     | 1,109 |     | 3,478 |       | 678 |  |       | 3,503 |

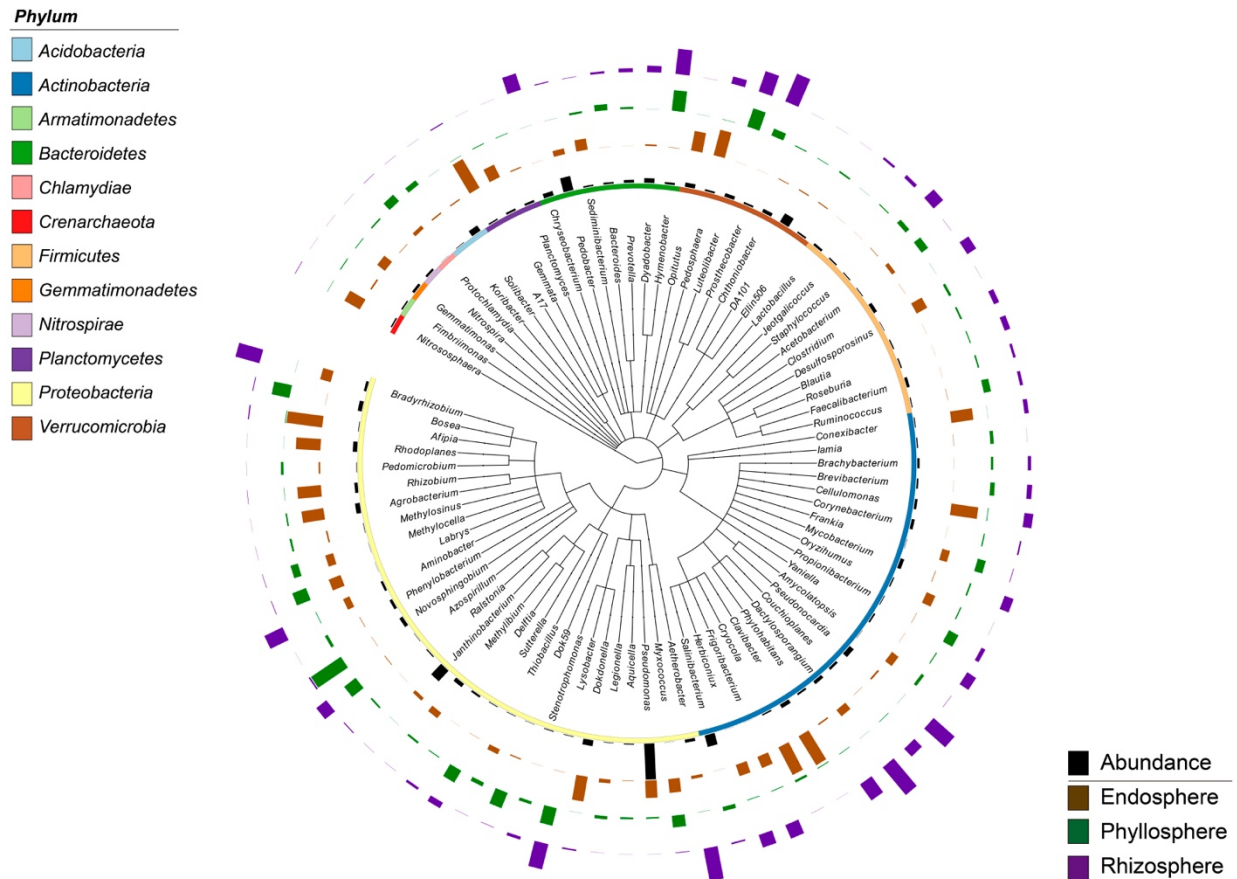

**Figure S1.** Indicator tree showing the taxonomy and taxon-treatment-association strength of 84 microbial genera significantly ( $q < 0.1$ ) associated with different compartments within Antarctic plants. Colors within the inner circle identify phyla. Heights of black bars in the innermost ring represent the square-root transformed abundances of the corresponding genera in the overall community. Heights of the colored bars on the remaining rings represent the relative, significant, association-strength ( $q < 0.1$ ) between the corresponding genera and the different compartments in Antarctic plants.
